# Supplementary material
Source: PubMed Central journal article supplement (PMC3536398)
Supplement: JVI.02465-12_zjv999097076so1.pdf [file JVI.02465-12_zjv999097076so1.pdf]

**Herpes simplex virus membrane proteins gE/gI and US9 act cooperatively to promote transport of capsids and glycoproteins from neuron cell bodies into initial axon segments.**

Paul W. Howard, Tiffani L. Howard, and David C. Johnson\*

**SUPPLEMENTAL DATA LEGENDS**

**Figure S1. GS2843.** At time 0, a Married particle starts from a position 6  $\mu\text{m}$  from left and moves to middle of the frame before stalling, travelling  $\approx 50 \mu\text{m}$  in 42 seconds. A second Married particle begins from left side at 1 min 2 seconds and moved across entire frame ( $\approx 100 \mu\text{m}$ ?) over the course of 60 sec. Note that live cell imaging requires switching filters which creates a small separation of red and green signals with Married particles. A large gB vesicle comes into view at left side at 1:24 and moves, with stalling, across just over half of the field (55  $\mu\text{m}$ ) over the course of 34 sec.

**Figure S2. GS2843.** A Separate capsid appears at the left at 1 min, 22 sec and moves across most of the field,  $\approx 45\text{-}50 \mu\text{m}$ , over a period of 36 seconds.

**Figure S3. GS2843 $\Delta$ gE.** A gB vesicle at time 0 moves from the extreme left to the extreme right at 20 sec, traversing  $\approx 45\text{-}50 \mu\text{m}$ . A second gB puncta moves into view at 36 sec and across the entire field ( $\approx 45 \mu\text{m}$ ) until 56 sec.

**Figure S4. GS2843 $\Delta$ gE.** A bright Separate capsid, at the left, at time 0, moves up and down and across and out of frame at 26 sec, a distance of  $\approx 45\text{-}50 \mu\text{m}$ . Several gB puncta do not move substantially.

**Figure S5. GS2843 $\Delta$ US9.** A bright gB puncta at the left at time zero moves across the entire field (45-50  $\mu$ m) until time 26 sec. A second gB puncta comes into view at 34 seconds and moves across the entire frame ending at 1 min 2 sec.

**Figure S6. GS2843 $\Delta$ US9.** A Separate capsid moves into view at 1 min 14 sec and moves out of view about 5  $\mu$ m from the right side (a distance of 40-50  $\mu$ m) at 1 min 34 sec.

**Figure S7. GS2843 $\Delta$ gE $\Delta$ US9.** A gB puncta moves into view at the left side at 22 seconds and moves out of view at the right side (a distance of  $\approx$  100  $\mu$ m) at 1 min 4 sec.

**Figure S8. GS2843 $\Delta$ gE $\Delta$ US9.** A Separate capsid moved from the left side at time 0 across the entire field (45-50  $\mu$ m) until 36-38 sec.

**Figure S9. GS2843 cell body.** A Separate capsid moves from the cell body into the initial axon segment stalls then continues to move about 12  $\mu$ m with some stalling until 30 sec. At 30 sec a Married particle can be seen moving toward initial segment, stalls then moves into initial segment at 34 seconds and can be seen moving in the axon until 52 sec.

**Figure S10. GS2843 $\Delta$ gE $\Delta$ US9 two cell bodies.** Two neurons are shown, the one on the left is at an early stage of infection with most capsids in the nucleus and the neuron on the right is a later stage of infection with many capsids in the cytoplasm. No transport of capsids or gB was observed. Both neurons had prominent axons observed by phase contrast (not shown).
